# Supplementary material for: Mechanisms of Calorie Restriction: A Review of Genes Required for the Life-Extending and Tumor-Inhibiting Effects of Calorie Restriction
Source: PubMed Central journal article supplement (PMC6950657; doi:10.3390/nu11123068), 2019-12-16
Supplement: nutrients-11-03068-s001.pdf [file nutrients-11-03068-s001.pdf]

**Supplemental Table 1.** Pathways signified by differentially regulated genes between WT-CR and *Foxo3*<sup>+/-</sup> CR livers in the fasting phase.

| Pathways                                                                       | pValue   | Genes                                                                                             | Predicted Direction |
|--------------------------------------------------------------------------------|----------|---------------------------------------------------------------------------------------------------|---------------------|
| Role of NFAT in Regulation of the Immune Response                              | 0.001309 | PLCB1, PLCG1, AKT3, CD80, NFAT5, CAMK4, JUN, GNAO1, HLA-DOB, GNB3, MS4A2                          | Varied              |
| Chemokine Signaling                                                            | 0.004402 | Ppp1r12b, PTK2, JUN, CAMK4, PLCB1, PLCG1                                                          | Up                  |
| Cellular Effects of Sildenafil (Viagra)                                        | 0.007183 | Ppp1r12b, KCNQ2, CAMK4, MYH3, PDE5A, PLCB1, PLCG1, CACNG8                                         | Varied              |
| iCOS-iCOSL Signaling in T Helper Cells                                         | 0.009221 | CAMK4, NFAT5, CD80, HLA-DOB, AKT3, PLCG1, ICOSLG/LOC102723996                                     | Up                  |
| Role of Macrophages, Fibroblasts and Endothelial Cells in Rheumatoid Arthritis | 0.013715 | CAMK4, IL1RAPL2, FZD3, PLCG1, ROR2, NFAT5, JUN, WNT10A, GNAO1, AKT3, PLCB1, LEF1, LRP1            | Up                  |
| CD28 Signaling in T Helper Cells                                               | 0.014532 | JUN, CAMK4, NFAT5, CD80, HLA-DOB, AKT3, PLCG1                                                     | Up                  |
| Gαq Signaling                                                                  | 0.015054 | HTR2C, GNB3, CAMK4, Agtr1b, PLCB1, AKT3, PLCG1, FNBP1                                             | Up                  |
| Agrin Interactions at Neuromuscular Junction                                   | 0.016987 | PTK2, CHRNA1, JUN, UTRN, NRG4                                                                     | Varied              |
| CXCR4 Signaling                                                                | 0.01806  | PTK2, GNB3, JUN, EGR1, GNAO1, PLCB1, AKT3, FNBP1                                                  | Varied              |
| D-myo-inositol (1,4,5)-Trisphosphate Biosynthesis                              | 0.020182 | PLCB1, PLCG1, PIP5K1B                                                                             | Up                  |
| PI3K Signaling in B Lymphocytes                                                | 0.021731 | JUN, CAMK4, NFAT5, FOXO3, PLCB1, AKT3, PLCG1                                                      | Up                  |
| Thrombin Signaling                                                             | 0.023947 | Ppp1r12b, PTK2, GNB3, CAMK4, GNAO1, PLCB1, AKT3, PLCG1, FNBP1                                     | Up                  |
| Regulation of IL-2 Expression in Activated and Anergic T Lymphocytes           | 0.028639 | JUN, CAMK4, NFAT5, CD80, PLCG1                                                                    | Up                  |
| Wnt/β-catenin Signaling                                                        | 0.031481 | JUN, WNT10A, FZD3, GNAO1, SOX12, AKT3, LEF1, LRP1                                                 | Varied              |
| G Protein Signaling Mediated by Tubby                                          | 0.034238 | GNB3, PLCB1, PLCG1                                                                                | Varied              |
| DNA Double-Strand Break Repair by Homologous Recombination                     | 0.035996 | GEN1, BRCA1                                                                                       | Varied              |
| B Cell Development                                                             | 0.036964 | CD80, IGHM, HLA-DOB                                                                               | Varied              |
| Glioblastoma Multiforme Signaling                                              | 0.040292 | WNT10A, FZD3, PLCB1, AKT3, PLCG1, LEF1, FNBP1                                                     | Up                  |
| nNOS Signaling in Skeletal Muscle Cells                                        | 0.040949 | CHRNA1, CAMK4                                                                                     | Varied              |
| Protein Kinase A Signaling                                                     | 0.041655 | PTPRE, CAMK4, CNGA4, MYLK3, PLCG1, PPP1R3A, PTK2, NFAT5, GNB3, PDE5A, PLCB1, LEF1, ANAPC11, PTPRT | Varied              |
| P2Y Purigenic Receptor Signaling Pathway                                       | 0.04533  | P2RY4, GNB3, JUN, PLCB1, AKT3, PLCG1                                                              | Varied              |
| Sperm Motility                                                                 | 0.046884 | PTK2, CNGA4, CAMK4, PLCB1, PLCG1, PLA2G4F                                                         | Up                  |

**Supplemental Table 2.** Pathways signified by differentially regulated genes between WT-CR and *Foxo1*<sup>+/-</sup> CR livers in the fasting phase.

| Pathways                                                   | p Value | Genes                               | Predicted direction |
|------------------------------------------------------------|---------|-------------------------------------|---------------------|
| Nur77 Signaling in T Lymphocytes                           | 0.0103  | CAMK4, HLA-DQA1, HLA-DQB1, HLA-DRB5 | Down                |
| Acyl-CoA Hydrolysis                                        | 0.0133  | ACOT2, ACOT1                        | Down                |
| B Cell Development                                         | 0.0140  | HLA-DQA1, HLA-DQB1, HLA-DRB5        | Down                |
| Melatonin Degradation III                                  | 0.0149  | MPO                                 | Up                  |
| Calcium-induced T Lymphocyte Apoptosis                     | 0.0153  | CAMK4, HLA-DQA1, HLA-DQB1, HLA-DRB5 | Down                |
| Antigen Presentation Pathway                               | 0.0176  | HLA-DQA1, CD74, HLA-DRB5            | Down                |
| Role of Oct4 in Mammalian Embryonic Stem Cell Pluripotency | 0.0311  | FOXA2, CDX2, SALL4                  | Up                  |
| Graft-versus-Host Disease Signaling                        | 0.0347  | HLA-DQA1, HLA-DQB1, HLA-DRB5        | Down                |
| Autoimmune Thyroid Disease Signaling                       | 0.0366  | HLA-DQA1, HLA-DQB1, HLA-DRB5        | Down                |
| Allograft Rejection Signaling                              | 0.0398  | H2-T3, HLA-DQA1, HLA-DQB1, HLA-DRB5 | Down                |
| FXR/RXR Activation                                         | 0.0418  | FOXO1, SREBF1, FOXA2, VLDLR, FGA    | Varied              |
| OX40 Signaling Pathway                                     | 0.0442  | H2-T3, HLA-DQA1, HLA-DQB1, HLA-DRB5 | Down                |
